# Supplementary material for: Probing low abundant DNA methylation by CRISPR-Cas12a-assisted cascade exponential amplification
Source: Royal Society of Chemistry journal article supplement (doi:10.1039/d2an00170e), 2022-01-01
Supplement: d2an00170e3.pdf [file d2an00170e3.pdf]

## Supporting Information

### Probing Low Abundant DNA Methylation by CRISPR-Cas12a-assisted Cascade Exponential Amplification

Liangliang Zhang,<sup>a,b</sup> Xianxian Zhao,<sup>a</sup> Xiaolin Hu,<sup>a,b</sup> Yi Zhang,<sup>c</sup> Ruining Liu,<sup>a</sup> Hai Peng,<sup>a</sup>  
Youhao Chen,<sup>f</sup> Hong Zhang,<sup>\*a,d</sup> Yang Luo,<sup>\*a,c</sup>

#### Author affiliations

- a. Center of Smart Laboratory and Molecular Medicine, School of Medicine, Chongqing University, Chongqing 400044, P.R. China.
- b. Key Laboratory for Biorheological Science and Technology of Ministry of Education, State and Local Joint Engineering Laboratory for Vascular Implants, College of Bioengineering, , Chongqing University, Chongqing 400030, P.R. China.
- c. Department of Clinical Laboratory, Fuling Hospital, Chongqing University, Chongqing 408099, P.R. China.
- d. Department of Clinical Laboratory, The Second Hospital of Shandong University, Jinan, Shandong, 250033, P.R. China.
- e. Zhejiang provincial people's hospital, Hangzhou, 310014, PR. China
- f. Department of Orthopaedics, Three Gorges Hospital, Chongqing University, Chongqing, 404100, PR. China

† These authors contributed equally to this work.

\*Send correspondence to: [luoy@cqu.edu.cn](mailto:luoy@cqu.edu.cn); [annicq@163.com](mailto:annicq@163.com)

**Table S1.** Details of the sequences used in the article

| Title          | Sequence (5'-3')                                                                                                                     |
|----------------|--------------------------------------------------------------------------------------------------------------------------------------|
| Methylated     | GAGGGTGGGG <sup>m</sup> CGGAC <sup>m</sup> CG <sup>m</sup> CGTG <sup>m</sup> CGCT <sup>m</sup> CGG <sup>m</sup> CGG <sup>m</sup> CTG |
| Unmethylated   | GAGGGTGGGGCGGACCGCGTGCGCTCGGCGGCTG                                                                                                   |
| Padlock        | CACGCGGTCCGCCCCACCCTCCCTCAGCAAAAAACAGAAATTACCCTATAGTG<br>AGTCGTATATTAATAACATCCAAAATTACCTCAGCCAGCCGCCGAGCG                            |
| sgRNA          | UAAUUUCUACUAAGUGUAGAUUUAUAGUGAGUCGUAUAAU                                                                                             |
| Reporter probe | FAM-TTTTAAAATTATA-BHQ                                                                                                                |

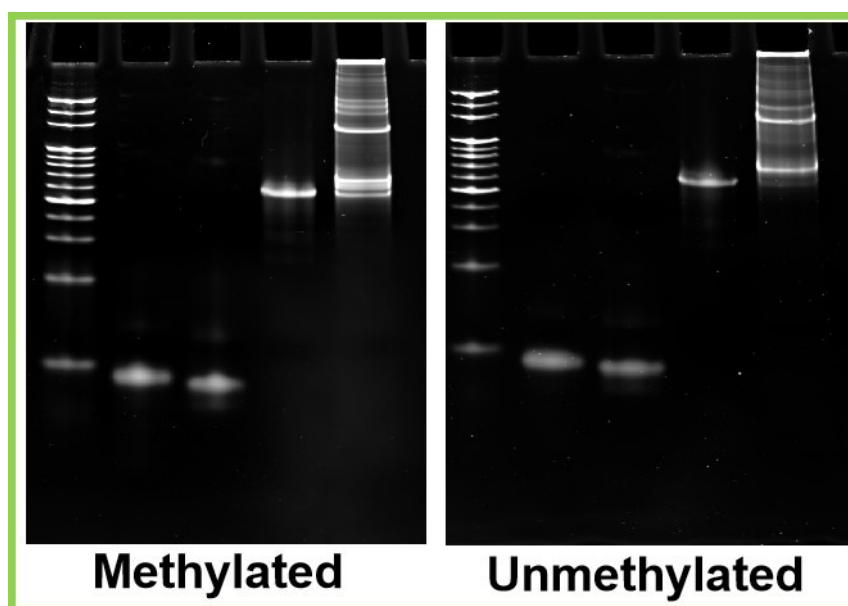

**Figure S1.** PAGE analysis result of the RCA process with methylated (left) and Unmethylated DNA sequence (right) before bisulfite treatment.

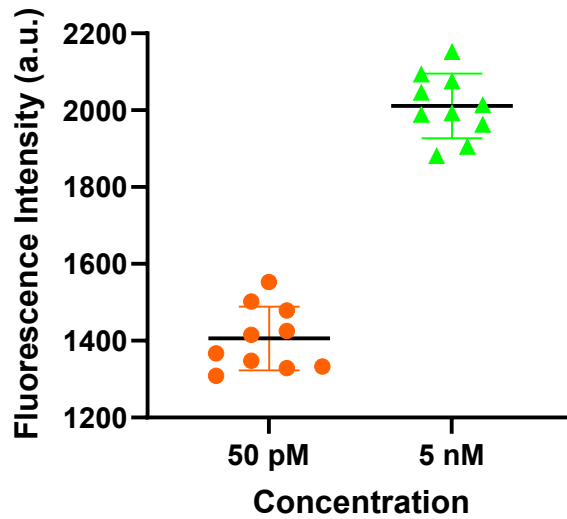

**Figure S2.** Repeatability of the CAM approach among 10 replicated experiments using samples with 5 nM and 50 pM of methylated DNA. Error bars represent standard derivation,  $n = 10$  technical duplicates.

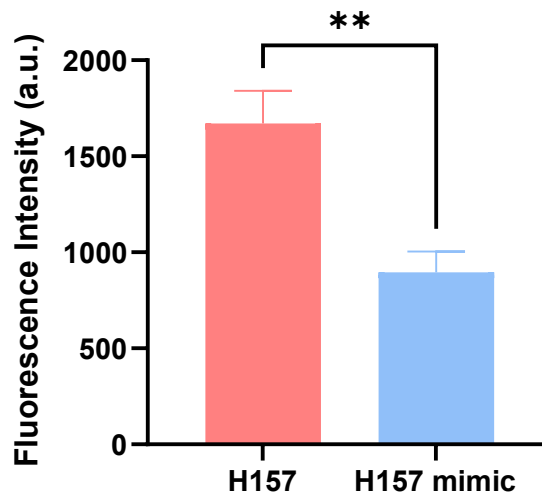

**Figure S3.** The peak of the fluorescence intensity with the amount of genomic DNA extracted from human lung cancer cells H157 and H157 mimic. Error bars represent standard derivation,  $n = 3$  technical duplicates.  $**p < 0.01$
